1 **Health impacts of takeaway management zones around schools in six different local**  
2 **authorities across England: a public health modelling study using PRIMETIME**

3

4 Nina Trivedy Rogers<sup>1</sup>, Ben Amies-Cull<sup>2</sup>, Jean Adams<sup>1</sup>, Michael Chang<sup>3</sup>, Steven Cummins<sup>4</sup>,  
5 Daniel Derbyshire<sup>5</sup>, Suzan Hassan<sup>4</sup>, Matthew Keeble<sup>1</sup>, Bochu Liu<sup>6,7</sup>, Antonieta Medina-Lara<sup>5</sup>  
6 Bea Savory<sup>4</sup>, John Rahilly<sup>8</sup>, Richard Smith<sup>5</sup>, Clare Thompson<sup>9</sup>, Martin White<sup>1</sup>, Oliver  
7 Mytton<sup>8</sup>, Thomas Burgoine<sup>1</sup>

8

9 <sup>1</sup>MRC Epidemiology Unit, University of Cambridge School of Clinical Medicine, Box 285  
10 Institute of Metabolic Science, Cambridge Biomedical Campus, Cambridge, CB2 0QQ, UK.

11 <sup>2</sup>Nuffield Department of Primary Care Health Sciences, University of Oxford, Oxford, UK

12 <sup>3</sup>Office for Health Improvement and Disparities, Department of Health and Social Care, UK

13 <sup>4</sup>Population Health Innovation Lab, Department of Public Health, Environments & Society,  
14 London School of Hygiene & Tropical Medicine, 15-17 Tavistock Place, London WC1H  
15 9SH

16 <sup>5</sup>Department of Public Health and Sport Sciences, Faculty of Health and Life Sciences,  
17 University of Exeter, UK

18 <sup>6</sup>Key Laboratory of Ecology and Energy-Saving Study of Dense Habitat (Ministry of  
19 Education of China), Tongji University, Shanghai, China.

20 <sup>7</sup>Department of Urban Planning, College of Architecture and Urban Planning, Tongji  
21 University, Shanghai, China

22 <sup>8</sup>UCL Great Ormond Street Institute of Child Health, 30 Guilford Street, London, WC1N  
23 1EH, UK

24 <sup>9</sup>School of Health and Social Work, University of Hertfordshire, UK

25

26 \*Corresponding author: Nina T Rogers

27

28 MRC Epidemiology Unit, University of Cambridge School of Clinical Medicine, Box 285

29 Institute of Metabolic Science, Cambridge Biomedical Campus, Cambridge, CB2 0QQ, UK.

30

31

32

33 **Abstract**

34 **Background:** In England, the number of takeaway food outlets ('takeaways') has been  
35 increasing for over two decades. Takeaway management zones around schools are an  
36 effective way to restrict the growth of new takeaways but their impacts on population health  
37 have not been estimated.

38

39 **Methods:** To model the impact of takeaway management zones on health, we used estimates  
40 of change in and exposure to takeaway outlets (across home, work, and commuting buffers)  
41 based on a previous evaluation suggesting that 50% of new outlets were prevented from  
42 opening because of management zones. Based on previous cross-sectional findings, we used  
43 changes in takeaway exposure to estimate changes in BMI, from 2018 to 2040. Finally, we  
44 used PRIMETIME, a proportional multistate lifetable model, and BMI change to estimate the  
45 impact of the intervention, in a closed-cohort of adults (25-64 years), in terms of incidence of  
46 12 non-communicable diseases, obesity prevalence, quality-adjusted life years (QALYs) and  
47 healthcare costs saved by 2040 in six selected local authorities across the rural-urban  
48 spectrum in England (Wandsworth, Manchester, Blackburn with Darwen, Sheffield, North  
49 Somerset, and Fenland).

50

51 **Results:** By 2031, compared to no intervention, reductions in outlet exposure ranged from 3  
52 outlets/person in Fenland to 28 outlets/person in Manchester. This corresponded to per person  
53 reductions in BMI of 0.68 and 0.08 kg/m<sup>2</sup>, respectively. Relative to no intervention, obesity  
54 prevalence was estimated to be reduced in both sexes in all LAs, including by 2.3 percentage  
55 points (PP) (95% uncertainty interval:2.9PP, 1.7PP) to 1.5PP (95%UI:1.9PP, 1.1PP) in males  
56 living in Manchester and Wandsworth by 2040, respectively. Model estimates showed  
57 reductions in incidence of disease, including type II diabetes (eg: 964 (95%UI:1565, 870)  
58 fewer cases /100,000 population for males in Manchester)), cardiovascular diseases, asthma,

59 certain cancers and low back pain. Savings in healthcare costs (millions(£)) ranged from  
60 £0.90 (95%UI: £1.23, £0.54) in Fenland to £5.44 (95%UI:£3.87, £7.45) in Manchester. Gains  
61 in QALYs/100,000 person were broadly similar across local authorities.

62

63 **Conclusions:** Takeaway management zones in England have the potential to meaningfully  
64 contribute towards reducing obesity prevalence and associated healthcare burden in the adult  
65 population, both at the local level and across the rural-urban spectrum.

66 **Key words:** Takeaway(“fast-”)food outlets; Management zones around schools; Health  
67 impact modelling; Body Mass Index; Obesity; Non-communicable diseases; Quality-  
68 Adjusted Life Years, Healthcare cost savings, PRIMETIME

69

70 **Introduction**

71 Meals purchased out-of-home, including foods from takeaway food outlets (“takeaways”),  
72 are typically energy dense and high in sugar and salt, but low in micronutrients, and tend to  
73 be served in large portions<sup>1-3</sup>. Consumption of takeaway food is associated with lower diet  
74 quality, higher energy intake and body mass index (BMI), weight gain and greater risk of  
75 obesity<sup>4,5</sup>. This may be a result of passive over-consumption of takeaway foods, which  
76 bypass regular human satiety mechanisms<sup>6</sup>. In turn, poor diet and excess weight are risk  
77 factors for diseases including type II diabetes and cardiovascular disease<sup>7-9</sup>.

78

79 Neighbourhood food environments have become a focus for public health action as they may  
80 encourage unhealthy dietary behaviours<sup>10</sup>. Local residential exposure to takeaways has been  
81 associated with higher levels of takeaway food consumption, BMI and risk of obesity in  
82 adults<sup>11-14</sup> and children<sup>15</sup> although this relationship has not been observed in all studies<sup>16</sup>.

83 Differences between takeaway exposure and change in BMI have been hypothesised to differ  
84 between neighbourhoods in urban and rural areas due to differences in the structure of the  
85 built environment, and in the dietary patterns and levels of overweight of residents<sup>17,18</sup>.

86 However, one study in the Netherlands found that takeaway exposure within 1km of the  
87 home was associated with higher BMI in both rural and urban populations<sup>19</sup>.

88

89 In the UK, takeaways continue to increase in number, with 47,961 registered in 2023,  
90 equating to a 2.8% increase per year from 2018 onwards<sup>20</sup>. In one study in Norfolk, England,  
91 longer term data suggests that the density of takeaways increased by approximately 44% over  
92 an 18 year period from 1990 to 2008, with higher densities and stronger growth in more  
93 deprived areas<sup>21</sup>. A 34% increase in expenditure on takeaway food from £7.9 billion in 2009  
94 to £9.9 billion in 2016 has previously been reported by the takeaway food industry<sup>22</sup>.

95

96 Takeaways have been shown to cluster within walking distance of schools in England and  
97 other countries<sup>23,24</sup>. In England, and often with the stated intention of improving health, urban  
98 planners can use existing powers to prevent new takeaways opening, thereby limiting growth  
99 in people's future exposure to takeaways. These "takeaway management zones" are  
100 commonly centred on schools, for example where no new takeaways are permitted within  
101 400m radius of a school site. These are also sometimes referred to by local authorities (LAs)  
102 as takeaway "exclusion zones". It has previously been estimated that management zones in  
103 England covered an average of 17% of land area in the LAs in which they have been adopted;  
104 a significant spatial footprint with capacity therefore to affect whole populations, in addition  
105 to children<sup>25</sup>. A recent study showed that implementation of management zones was  
106 associated with a 54% reduction in the number of new takeaways at up to six years post-  
107 intervention<sup>26</sup>. This is likely due to a combination of a decrease in the number of planning  
108 applications submitted for new takeaways, and an increase in the percentage of these  
109 applications being rejected, which was also observed in these areas<sup>25</sup>. However, the extent to  
110 which takeaway management zones around schools may benefit population health due to this  
111 retail change has not been explored.

112

113 Evaluating the future health impacts of takeaway management zones around schools is  
114 important to inform uptake and implementation. A lack of evidence in this regard has been  
115 cited as a barrier to adoption<sup>27,28</sup>. Such evidence is also important in the defence of takeaway  
116 management zones against legal challenges as the proportionality principle requires potential  
117 harms to private interests be offset by the likelihood of benefits to the public<sup>29</sup>. However, as  
118 the future is uncertain this is inherently difficult. The potential positive health impacts of  
119 takeaway management zones may also accrue over a long time-period, making it challenging  
120 and untimely to *observe* the effects of policy adoption. However, mathematical modelling can  
121 be used to predict future impacts and help inform decision making<sup>30</sup>. The PRIMETIME model

122 is a multistate lifetable that has been used to estimate the health impacts of other  
123 interventions such as the UK soft drink industry levy and restrictions of television advertising  
124 unhealthy foods to children<sup>31</sup>. In this study, we aimed to estimate the future health impacts, to  
125 2040, of the adoption of takeaway management zones around schools in six different LAs  
126 across England.

127

## 128 **Methods**

### 129 **Scenarios of restricted future takeaway growth**

130 We used data from a previously published forecast model to the year 2031 of mean changes in  
131 population exposure to takeaways in absence of the intervention i.e. under business-as-usual  
132 conditions. Briefly, the model used historical observed rates of growth in takeaways in  
133 non-adopter LAs that were similar in terms of urban-rural class to six purposively selected LAs:  
134 Wandsworth, Manchester, Sheffield, Blackburn with Darwen, North Somerset and Fenland (Table  
135 1)<sup>32</sup>. These LAs were selected to represent classes across the rural-urban spectrum and to ensure  
136 geographical breadth across England. The selection also represented LAs that were either adopters  
137 of management zones around a similar year (Wandsworth, Manchester and Blackburn with  
138 Darwen) or hypothetical adopters (Sheffield, North Somerset and Fenland). Consequently, we also  
139 focus on these six LAs in our analysis. Population exposure to takeaways within LAs was  
140 measured across home, work and commuting domains, using census travel to work data<sup>32</sup>.  
141 Exposure to takeaways has previously been measured across these same three domains<sup>33</sup>. Full  
142 details of this forecast and population exposure model have been published elsewhere<sup>31</sup>.

143

144 In this study, relative to business-as-usual growth, we modelled impacts of policy adoption under  
145 a realistic scenario where there was a 50% reduction in new takeaways, informed by previous  
146 research<sup>26</sup>. While takeaway management zones were adopted between 2015 and 2017, we aligned  
147 implementation dates to 2018 to allow for comparison between LAs. We also carried out

148 sensitivity analysis under perfect implementation scenarios, whereby there was a 100% reduction  
149 in new takeaways following the intervention. We assumed the policy was in place between 2018  
150 and 2031 but given that forecasting in the longer term may lead to less precise estimates we  
151 assumed that any differences between business as usual and the intervention remained constant  
152 thereafter to 2040. Estimation of lower and upper confidence intervals for the three interventions  
153 were performed in R version 4.1.0.

154

### 155 **Relationship between change in takeaway exposure and BMI**

156 In a previous study of UK adults aged 29-62 years, those most exposed (quartile 4) to  
157 takeaways across home, work and commuting domains had on average 1.21 kg/m<sup>2</sup> (95% CI  
158 0.68, 1.74) greater BMI than those least exposed (quartile 1)<sup>33</sup>. This is equivalent to an  
159 increase in BMI of 0.0241 kg/m<sup>2</sup> for each additional takeaway a person is exposed to on a  
160 regular basis (unpublished results). Similar results from other analyses of these same data, but  
161 accounting only for home and work takeaway exposure, have also been reported<sup>11</sup>. This  
162 magnitude of association was similar to findings from a separate study using data from the  
163 Fenland Study, which showed 0.14 kg/m<sup>2</sup> higher BMI per five additional takeaways exposed  
164 to<sup>34</sup>. We used this figure to estimate mean change in BMI attributable to change in per person  
165 exposure to takeaways within each LA for adults aged 25-64 years. In supplementary analysis  
166 we estimated mean population BMI change across quintiles of deprivation within LAs (see  
167 Table S3) using estimates of takeaway exposure change and the same value for the  
168 relationship between takeaway exposure change and BMI.

169

### 170 **Health impact modelling using PRIMETIME**

171 We used PRIMETIME, a proportional multistate lifetable model, to simulate the impact of  
172 observed changes in BMI on a range of diet-related chronic diseases and other health  
173 outcomes. The PRIMETIME model works by simulating a change in obesity prevalence

174 attributable to the intervention. It then estimates changes in incidence of specified BMI-  
175 related diseases and in disease-specific death rates while keeping deaths unrelated to obesity  
176 stable. In our main analysis we estimated the health impacts for a closed cohort of adults aged  
177 25-64 years across 22 years (2018-2040) for each of the six LAs, assuming realistic  
178 implementation. We used Microsoft Excel to conduct 1000 runs of a Monte Carlo analysis in  
179 PRIMETIME, to estimate lower and upper uncertainty intervals (UI) of cases for 12 BMI-  
180 related non-communicable diseases and their associated quality adjusted life years (QALYs)  
181 benefits and healthcare cost saving outcomes.  
182  
183 Diseases related to BMI that were modelled in PRIMETIME were type II diabetes, ischaemic  
184 heart disease (IHD), atrial fibrillation/flutter, stroke, hypertensive heart disease, asthma,  
185 colon and rectum cancer, oesophageal cancer, breast cancer (females only), osteoarthritis (hip  
186 and knee) and low back pain. For estimating healthcare costs in PRIMETIME, disease-specific  
187 costs for each modelled disease are based on a range of routine national datasets including  
188 hospital episodes statistics admissions data, furthermore a detailed description of the model,  
189 including how healthcare costs are attributed to disease burden has been published  
190 previously<sup>35</sup>. QALYs were also estimated using utility weights and discounted using  
191 published National Institute for Health and Care Excellence (NICE) rates at a flat 3.5% for all  
192 health and costs<sup>36</sup>. In our results section we show total healthcare cost savings and QALYs  
193 gained in specific LAs and we also adjust the values by dividing them by the number of  
194 adults aged 25-64 living in a specific LA in 2018 and then multiplying by 100,000 to show  
195 values per 100,000 population. To ensure relevance of our estimates (i.e. because the  
196 associations between takeaway exposure and BMI has not been estimated for multiple age  
197 groups and it may differ between younger and older adults), we restricted our study to adults  
198 in their early to mid-life (25-64 years) at baseline in line with the original study that estimated  
199 effect of takeaway exposure on BMI?<sup>33</sup>.



200

201 Our modelling assumed that during the course of the study, the BMI of adults aged 65 plus  
202 were no longer influenced by a change in exposure to takeaways, with any differences in  
203 BMI between business-as-usual and the intervention scenario remaining constant in this  
204 cohort after this point. This decision was informed by recent literature on dietary intake that  
205 showed how in the UK, younger adults (aged 19-29 years) were five times as likely to eat  
206 takeaway meals at home relative to adults aged 70 years+<sup>37</sup>. Thus, we took a cautious  
207 approach to ensure we did not overestimate any potential impact of reduction in exposure to  
208 takeaway outlets on BMI. Disease incidence estimates were based on time lags from the  
209 effect of BMI changes from takeaway exclusion zones. A time lag of five years was assigned  
210 for diabetes and cardiovascular diseases based on WHO estimates of reversal of stroke and  
211 heart disease<sup>38</sup>, 10 years for cancer based on cohort study findings examining intentional  
212 weight loss and breast cancer risk<sup>39</sup>, and one year for all other diseases. A schematic diagram  
213 of our analytical strategy is shown in figure 1.

214

215 In sensitivity analyses, relative to business-as-usual growth, we modelled impacts of policy  
216 adoption under a “perfect implementation” scenario where there was a total (100%) reduction  
217 in new takeaway growth in the takeaway management zones.

218

## 219 **Results**

220 Demographic characteristics of the six LAs are described in table 1. Wandsworth, a major urban LA  
221 in London, has a population density approximately 50 times higher than Fenland, an LA that is  
222 mainly rural. Urban LAs had populations with a higher proportion of younger adults (aged 25-44  
223 years). For example, 69% of the population of Wandsworth is within this age group, whereas it  
224 constitutes only 46% of Fenland’s population.

225

## 226 **Takeaway exposure following adoption of management zones**

227 Mean exposure to takeaways at baseline varied between the six LAs, with populations of  
228 rural LAs (North Somerset and Fenland) exposed on average to approximately two-thirds  
229 fewer takeaways than in other more urban LAs (Table 2). Adoption of takeaway management  
230 zones, assuming realistic implementation, led to exposure to fewer takeaways on average, per  
231 person, across all LAs relative to business as usual, with the highest absolute reductions in  
232 more urban areas. For example, in Manchester, realistic implementation was estimated to  
233 reduce average exposure to 28.4 (95% CI 25.8, 31.0) fewer new takeaways per person by  
234 2031, relative to business as usual. Reductions in takeaway exposure were lower in other  
235 LAs, with exposure to 3.2 (95% CI 1.98, 4.43) fewer new takeaways in Fenland, relative to  
236 business as usual. Reductions were stronger under an optimistic implementation scenario, and  
237 strongest under perfect implementation, where we estimated in Manchester that takeaway  
238 management zones with those stringencies would lead to exposure to 42.6 (95% CI 38.7,  
239 46.5) and 56.8 (95% CI 51.6, 61.9) fewer takeaways per person, relative to business as usual  
240 (Table S1).

241

## 242 **Changes in mean BMI after takeaway management zone implementation**

243 Realistic implementation was associated with an estimated per person reduction in BMI that  
244 was greatest in Manchester (0.68kg/m<sup>2</sup>; 95% CI 0.62, 0.75) and lowest in Fenland  
245 (0.08kg/m<sup>2</sup>; 95% CI 0.05, 0.11) in 2031 compared to business-as-usual, and that was overall  
246 greater in more urban LAs (Table 3). These patterns were consistent, but effects were  
247 stronger under an optimistic implementation scenario, and stronger still under perfect  
248 implementation, where in Manchester the intervention would result in BMI of 1.03 kg/m<sup>2</sup>  
249 (95%CI 0.93, 1.25) and 1.37 kg/m<sup>2</sup> (95%CI 1.24, 1.49) lower respectively, relative to  
250 business as usual (Table S2). Across the spectrum of deprivation within each LA, mean

251 population BMI change appeared stable, but with some indication that in rural areas, greater  
252 reductions in BMI may occur in the least deprived areas (Table S3).

253

#### 254 **Change in prevalence of obesity, QALYs and healthcare cost savings to 2040**

255 We estimated reductions in obesity prevalence for all LAs, compared to business as usual. In  
256 males, percentage point (PP) reductions in obesity prevalence ranged from 2.3PP (95% UI  
257 2.9, 1.7) in Manchester to 1.5PP (95% UI 1.9, 1.1) in Wandsworth (Table 4). In females these  
258 reductions ranged from 1.9PP (95% UI 2.4, 1.4) in Manchester and Sheffield to 1.5PP (95%  
259 UI 10.9, 1.2) in Wandsworth. Our models also estimated gains in total QALYs for all LAs,  
260 which ranged from a gain of 249 QALYs per 100,000 population for adults living in  
261 Manchester, to a gain of 194 QALYS per 100,00 adults living in North Somerset. In terms of  
262 healthcare cost savings, these ranged from £2.02 million saved per 100,000 adults in  
263 Manchester to £1.65 million saved per 100,000 adults living in Fenland over the 22 year  
264 period. In sensitivity analysis, healthcare cost savings, QALYs and change in prevalence of  
265 obesity were all approximately twice that observed under a realistic implementation scenario  
266 in the main analysis (Table S4).

267

#### 268 **Change in incident cases of disease to 2040**

269 The largest estimated reductions in cases of disease were for type II diabetes, with an  
270 estimated reduction of 1013 (95% UI 1285, 735) male and 837 (95% UI 1048, 634) female  
271 cases per 100,000 population, by 2040, in Blackburn with Darwen (Table 5). Reductions in  
272 all forms of cardiovascular disease were also observed, with reductions in IHD (e.g.  
273 Blackburn with Darwen, males: 153 cases/100,000 population, 95% UI 117, 192) and atrial  
274 fibrillation (e.g. Blackburn with Darwen, males: 73 cases/100,000 population, 95% UI 48,  
275 102) strongest in all LAs, and consistently more pronounced in males. Improvements for  
276 respiratory health, with marked reductions in asthma, particularly for females (e.g. Blackburn

277 with Darwen: 402 cases/100,000 population, 95% UI 220, 603), were also observed. Smaller  
278 reductions were estimated for oesophageal, breast, and colon and rectum cancers across all  
279 LAs. Of all cancers, case reductions were greatest for breast cancer. In terms of impacts on  
280 musculoskeletal disease, reductions were estimated for low back pain and more so for  
281 females than males (e.g. Blackburn with Darwen: 326 cases/100,000 population, 95% UI 17,  
282 644). Small increases in incidence rates for hip and knee osteoarthritis were consistently  
283 estimated for both sexes in all LAs. In sensitivity analysis, perfect implementation (i.e. no  
284 new takeaways being allowed to open after policy adoption) resulted in an almost doubling of  
285 reductions, in disease incidence across all LAs, relative to realistic implementation (Table  
286 S5).

287

## 288 **Discussion**

### 289 **Summary of findings**

290 Our findings suggest that takeaway management zones around schools could make a  
291 substantive contribution to improving adult health and associated healthcare costs. We  
292 estimated that this intervention would reduce prevalence of obesity by 1.5 to 2.3 percentage  
293 points by 2031, leading to improvements in BMI-related health outcomes to 2040. These  
294 estimates were forecast to result in reductions in incidence of a range of diseases by 2040,  
295 including type II diabetes, cardiovascular diseases, and asthma. Estimated healthcare cost  
296 savings and gains in QALYs were similar in magnitude across LAs, with healthcare savings  
297 ranging between £1.65 – 2.02 million per 100,000 population and gains in QALYs ranging  
298 from between 194 to 241 QALYs gained/ 100,000 population in North Somerset and  
299 Wandsworth, respectively. We also found that more stringent implementation of the policy,  
300 in alternate optimised or perfect scenarios, would result in even greater population health  
301 benefits.

302

### 303 **Comparison with other studies**

304 This is the first study attempting to estimate health impacts of takeaway exclusion zones,  
305 making it challenging to make direct comparisons with other studies. However, reductions in  
306 obesity prevalence in relation to takeaway management zones were consistent across LAs and  
307 in line with a number of other studies that have found a relationship between higher exposure  
308 to takeaways and increased BMI or risk of obesity in adults<sup>11-13</sup>. Meaningful reductions were  
309 estimated for future incidence of 12 obesity-related diseases to 2040 across all LAs  
310 irrespective of rural-urban classification. The most pronounced reductions, in all LAs, were  
311 in incidence of type II diabetes, which in males ranged from reductions of 803 cases/100,000  
312 population in largely rural North Somerset to 1206 cases/ 100,000 population in urban  
313 Wandsworth. Consistent with this finding, previous studies have shown a positive association  
314 between residential takeaway exposure and prevalence of type II diabetes<sup>7,9</sup>. This is an  
315 important finding because aside from older age, type II diabetes incurs the biggest financial  
316 cost of any single disease to NHS healthcare, accounting for 8% of secondary care costs and  
317 occupying 17% of hospital day-beds<sup>40</sup>. Our estimates also showed substantial reductions in  
318 incidence of cardiovascular diseases in response to adoption of management zones. The  
319 largest reductions in incident cases were seen in ischaemic heart disease (IHD), with smaller  
320 reductions in stroke and hypertensive heart disease. Consistent with this finding, a recent  
321 systematic review highlighted evidence of a relationship between takeaway exposure and  
322 cardiovascular disease risk<sup>41</sup>. Furthermore, another study found that incidence of CVD and to  
323 a lesser extent stroke, was also higher in adults exposed to more takeaways, which mirrors  
324 our observations<sup>8</sup>. Our model also estimated meaningful reductions in the incidence of some  
325 cancers, asthma, and low back pain. While research on the link between takeaway exposure  
326 and these conditions is lacking, each has been found to be associated with living with  
327 obesity<sup>42-44</sup>. We found no significant differences between adoption of the intervention and

328 BMI change by level of deprivation within LAs. This is similar to a previous study that found  
329 no differential impact of takeaway exposure across levels of household income<sup>13</sup>.

330

### 331 **Interpretation of findings**

332 Recent data from the Health Survey for England suggested that approximately 26% of adults  
333 are obese, with the highest prevalence in age-groups 45-74 years.<sup>45</sup> This suggests that adults  
334 in this age group may be an important group to target, especially given the relationship  
335 between obesity and disability and chronic disease in older adults<sup>46</sup>. However, while the  
336 significant reductions in obesity prevalence estimated by our models are encouraging (e.g.  
337 1.9 PP in females in Sheffield), they also illustrate the need for a broader set of diet-related  
338 interventions to further reduce prevalence of obesity. Many public health interventions are  
339 cost saving<sup>47</sup> and while the financial costs of the implementation of takeaway management  
340 zones were not included in our study and should be integrated into future analyses, healthcare  
341 savings were estimated to range from £1.65 million per 100,000 population in North  
342 Somerset to £2.02 million per 100,000 population in Wandsworth by 2040. If sustained over  
343 a period of 22 years, our modelling also showed that takeaway management zones could add  
344 between 101 (Blackburn) and 425 (Manchester) QALYs for males alone, suggesting that the  
345 intervention has the potential to make meaningful improvements to the quality of life of  
346 whole populations. Our models also estimated slight increases in incidence of knee and hip  
347 osteoarthritis. While BMI is associated with osteoarthritis<sup>48</sup>, this finding can be explained by  
348 the higher proportion of older adults surviving in the population because of the intervention<sup>49</sup>.  
349 While our findings estimate larger BMI reductions in more urban LAs, our modelling of  
350 health impacts does not mirror this difference between urban and rural areas with incidence  
351 of non-communicable diseases and change in obesity prevalence, healthcare savings and  
352 QALYs per person. This finding may reflect differences in the demographics of selected LAs  
353 including baseline obesity levels, deprivation and age which are risk factors for poor health.

354

## 355 **Study limitations**

### 356 *Limitations: Forecasting model of takeaway growth*

357 Our study makes use of unique forecasts of long-term population exposure to takeaways in  
358 the absence of intervention, in six different types of LAs, based on continuation of pre-  
359 existing trends in takeaway growth. As the intervention can only stop future growth, the  
360 benefits of the intervention are contingent on continued growth (in the absence of  
361 intervention), and this is inherently uncertain. For example, to what extent will growth in  
362 numbers of physical premises continue (and to be important) if online takeaway delivery use  
363 continues to rise. Further detail on limitations of this method have been published  
364 previously<sup>32</sup>. There is also uncertainty around the effectiveness of the implementation. To  
365 address this, in addition to a core scenario based on recent estimates of real-world impact<sup>50</sup>,  
366 we also provided estimates based on alternative scenarios.

367

### 368 *Limitations: generalisability*

369 Our findings are not readily generalisable to children. In this study we focussed on the adult  
370 population, in part because previously published associations between takeaway exposure  
371 and BMI were based on similar working-age UK adults<sup>11</sup>. Also because takeaway  
372 management zones affect a wide geographical area, it is reasonable to assume they will also  
373 impact the adult population. Moreover, the geographic and social determinants of takeaway  
374 consumption in children may be different and this should be the subject of future research.  
375 While observational studies in children show an association between takeaway consumption  
376 and energy intake, no corresponding association between takeaway consumption and body  
377 weight has been observed, perhaps because energy demands tend to be higher for growth and  
378 development<sup>51,52,53</sup>. Evidence on the relationship between exposure to takeaways and body  
379 weight in older populations is also currently lacking, thus our models did not include adults

380 who were aged 65 years and over at study baseline. However, a study using data from the UK  
381 National Diet and Nutrition Survey found that adults aged 70 years and over were one fifth as  
382 likely to eat takeaway meals at home compared to young adults aged 19-29 years. This  
383 supports the idea that dietary behaviours are subject to change over the lifecourse<sup>37</sup>,  
384 necessitating further modelling of intervention impacts in this older age group.

385

#### 386 *Limitations: PRIMETIME modelling*

387 The PRIMETIME model excludes some important diseases associated with BMI, including  
388 depression and dementia, potentially leading to our results being an underestimation of effect  
389 sizes for savings in healthcare costs and QALYs<sup>52,53</sup>. In choosing to model a closed cohort we  
390 will have potentially further underestimated the health and healthcare cost savings. BMI is  
391 also positively linked to need for social care provision<sup>54</sup> however we have not modelled  
392 social care costs. In the UK, social care costs (in contrast to healthcare costs) are borne by the  
393 local authority, and so the returns to the body that bears the risks and costs of the intervention  
394 are not quantified here.

395

#### 396 *Limitations: Online food delivery*

397 We were unable to account for the impact of online food delivery services (e.g. Just Eat,  
398 Deliveroo), which may attenuate the relationship between takeaway management zones and  
399 health. These fast-growing services are likely to increase the availability of takeaway food,  
400 which the intervention was designed to reduce, thereby reducing its impact. In one UK study,  
401 online food delivery services were used at least once per week by approximately 15% of  
402 adults in 2018<sup>55</sup> and there is evidence that access is unequal between urban and rural  
403 areas<sup>56</sup> From 2020 to 2022, access to online delivery takeaways was found to have increased  
404 by 10% for those living in the most deprived areas of England<sup>57</sup>. Adults living in the UK who  
405 have access to the greatest number of takeaways online were also found to have the greatest



406 odds of using online food delivery services<sup>58 55</sup>. Future research should consider the  
407 possibility that place-based interventions such as management zones may to some extent be  
408 undermined by new modes of takeaway food purchasing.

409

#### 410 **Policy implications and future directions**

411 A lack of evidence of health benefits associated with the adoption of takeaway management  
412 zones around schools has been cited as a barrier to policy adoption and effective  
413 implementation<sup>27,28</sup>. Building on recent studies that have observed the retail impacts of policy  
414 adoption<sup>26,59</sup>, our modelling work now provides evidence on the population health impacts  
415 that could be achieved through the adoption and (even imperfect) implementation of  
416 takeaway management zones around schools. We also showed how stricter, perfect or even  
417 optimised implementation (preventing takeaway growth by 100% and 75%, respectively)  
418 would result in even greater benefits to 2040. Local decision makers should therefore remain  
419 diligent in the strict implementation of takeaway management zones if optimum population  
420 health is to be achieved.

421 In addition to a range of health benefits we also modelled economic benefits associated with  
422 the adoption of takeaway management zones around schools, which were achieved through a  
423 reduction in healthcare costs. Although these economic benefits may not accrue locally, these  
424 cost savings are important evidence for those working in LAs who seek to understand the  
425 wider health benefits of management zones<sup>60</sup>. It is still possible however, as argued by  
426 inspectors from the national planning inspectorate, that management zones could be  
427 detrimental to the economy, through denying business growth and curtailing employment  
428 opportunities<sup>61</sup>. As public health interventions are liable to legal challenge under the principle  
429 of proportionality, future work should include a full economic analysis, considering both  
430 health and social care costs and benefits, alongside these other economic considerations.

431 Future studies should also account for the continued emergence and growth of online food  
432 delivery platforms, which could diminish the health impacts of this intervention.

433

#### 434 **Conclusions**

435 This is the first study to model the health impacts of the adoption and implementation of  
436 takeaway management zones (sometimes referred to by LAs as “exclusion zones”) around  
437 schools in . In response to a realistic intervention scenario and across a range of different  
438 types of LAs, we found meaningful reductions in population-level BMI and obesity  
439 prevalence, and in a variety of associated non-communicable diseases including incidence of  
440 type II diabetes, cardiovascular diseases, cancers, asthma and low back pain, to the year  
441 2040. We also found associated health-related benefits including gains in QALYs and  
442 savings in healthcare costs. Takeaway management zones around schools may be an effective  
443 population-level intervention to improve diet-related health in adults in the UK <sup>62</sup>

444

#### 445 **Funding and acknowledgements**

446 This study is funded by the National Institute for Health Research (NIHR) Public Health  
447 Research Programme (Project number: NIHR130597). The views expressed are those of the  
448 author(s) and not necessarily those of the NIHR or the Department of Health and Social Care.  
449 JR, MK, BL, AS, SJS, MW, NR, JA and TB were supported by the Medical Research  
450 Council (grant number MC\_UU\_00006/7). OM is supported by a UKRI Future Leaders  
451 Fellowship (MR/T041226/1)). For the purpose of open access, the author has applied a  
452 Creative Commons Attribution (CC BY) licence to any Author Accepted Manuscript version  
453 arising.

454

455

456 **References**

- 457 1 Bowman SA, Vinyard BT. Fast Food Consumption of U.S. Adults: Impact on Energy  
458 and Nutrient Intakes and Overweight Status. *J Am Coll Nutr* 2004; **23**: 163–8.
- 459 2 Lachat C, Nago E, Verstraeten R, Roberfroid D, Van Camp J, Kolsteren P. Eating out  
460 of home and its association with dietary intake: a systematic review of the evidence.  
461 *Obes Rev* 2012; **13**: 329–46.
- 462 3 Goffe L, Rushton S, White M, Adamson A, Adams J. Relationship between mean  
463 daily energy intake and frequency of consumption of out-of-home meals in the UK  
464 National Diet and Nutrition Survey. *International Journal of Behavioral Nutrition and*  
465 *Physical Activity* 2017; **14**: 1–11.
- 466 4 Schröder H, Fito M, Covas MI. Association of fast food consumption with energy  
467 intake, diet quality, body mass index and the risk of obesity in a representative  
468 Mediterranean population. *British Journal of Nutrition* 2007; **98**: 1274–80.
- 469 5 Duffey KJ, Gordon-Larsen P, Steffen LM, Jacobs DR, Popkin BM. Regular  
470 consumption from fast food establishments relative to other restaurants is differentially  
471 associated with metabolic outcomes in young adults. *Journal of Nutrition* 2009; **139**:  
472 2113–8.
- 473 6 Prentice AM, Jebb SA. Fast foods, energy density and obesity: a possible mechanistic  
474 link. *Obesity Reviews* 2003; **4**: 187–94.
- 475 7 Ntarladima AM, Karssenberg D, Poelman M, *et al.* Associations between the fast-food  
476 environment and diabetes prevalence in the Netherlands: a cross-sectional study.  
477 *Lancet Planet Health* 2022; **6**: e29–39.
- 478 8 Poelman M, Strak M, Schmitz O, *et al.* Relations between the residential fast-food  
479 environment and the individual risk of cardiovascular diseases in The Netherlands: A  
480 nationwide follow-up study. *Eur J Prev Cardiol* 2018; **25**: 1397–405.

- 481 9 Sarkar C, Webster C, Gallacher J. Are exposures to ready-to-eat food environments  
482 associated with type 2 diabetes? A cross-sectional study of 347□551 UK Biobank  
483 adult participants. *Lancet Planet Health* 2018; **2**: e438–50.
- 484 10 Glanz K, Sallis JF, Saelens BE, Frank LD. Healthy nutrition environments: Concepts  
485 and measures. *American Journal of Health Promotion* 2005; **19**: 330–3.
- 486 11 Burgoine T, Forouhi NG, Griffin SJ, Wareham NJ, Monsivais P. Associations between  
487 exposure to takeaway food outlets, takeaway food consumption, and body weight in  
488 Cambridgeshire, UK: Population based, cross sectional study. *BMJ (Online)* 2014;  
489 **348**: 1–10.
- 490 12 van Erpecum CPL, van Zon SKR, Bültmann U, Smidt N. The association between the  
491 presence of fast-food outlets and BMI: the role of neighbourhood socio-economic  
492 status, healthy food outlets, and dietary factors. *BMC Public Health* 2022; **22**.  
493 DOI:10.1186/S12889-022-13826-1.
- 494 13 Burgoine T, Sarkar C, Webster CJ, Monsivais P. Examining the interaction of fast-  
495 food outlet exposure and income on diet and obesity: Evidence from 51,361 UK  
496 Biobank participants. *International Journal of Behavioral Nutrition and Physical  
497 Activity* 2018; **15**: 1–12.
- 498 14 Athens JK, Duncan D, Elbel B. Proximity to Fast Food Outlets and Supermarkets as  
499 Predictors of Fast Food Dining Frequency. *J Acad Nutr Diet* 2017; **116**.
- 500 15 Fraser L, Edwards K. The association between the geography of fast food outlets and  
501 childhood obesity rates in Leeds, UK. *Health Place* 2010; **16**: 1124–8.
- 502 16 Mackenbach JD, Charreire H, Glonti K, *et al*. Exploring the Relation of Spatial Access  
503 to Fast Food Outlets With Body Weight: A Mediation Analysis. *Environ Behav* 2019;  
504 **51**: 401–30.

- 505 17 Dekker LH, Rijnks RH, Strijker D, Navis GJ. A spatial analysis of dietary patterns in a  
506 large representative population in the north of The Netherlands - the Lifelines cohort  
507 study. *Int J Behav Nutr Phys Act* 2017; **14**: 166.
- 508 18 Zijlema WL, Klijs B, Stolk RP, Rosmalen JGM. (Un)healthy in the city: Respiratory,  
509 cardiometabolic and mental health associated with urbanity. *PLoS One* 2015; **10**.  
510 DOI:10.1371/journal.pone.0143910.
- 511 19 van Erpecum CPL, van Zon SKR, Bültmann U, Smidt N. The association between  
512 fast-food outlet proximity and density and Body Mass Index: Findings from 147,027  
513 Lifelines Cohort Study participants. *Prev Med (Baltim)* 2022; **155**: 106915.
- 514 20 Takeaway & Fast-Food Restaurants in the UK - Number of Businesses. *IBISWorld*  
515 2023.
- 516 21 Maguire ER, Burgoine T, Monsivais P. Area deprivation and the food environment  
517 over time: A repeated cross-sectional study on takeaway outlet density and  
518 supermarket presence in Norfolk, UK, 1990-2008. *Health Place* 2015; **33**: 142–7.
- 519 22 The Takeaway Economy Report. Centre for Economics and Business Research. 2017.
- 520 23 Day P, Pearce J. Obesity-Promoting Food Environments and the Spatial Clustering of  
521 Food Outlets Around Schools. *Am J Prev Med* 2011; **40**: 113–21.
- 522 24 Blow J, Gregg R, Davies IG, Patel S. Type and density of independent takeaway  
523 outlets: A geographical mapping study in a low socioeconomic ward, Manchester.  
524 *BMJ Open* 2019; **9**: 1–7.
- 525 25 Rahilly J, Williams A, Chang M, *et al.* Changes in the number and outcome of  
526 takeaway food outlet planning applications in response to adoption of exclusion zones  
527 around schools in England: a time series analysis. *Health Place* 2023.
- 528 26 Rahilly J, Amies-cull B, Chang M, *et al.* Changes in the number of new takeaway food  
529 outlets associated with adoption of management zones around schools: A natural  
530 experimental evaluation in England. *SSM Popul Health* 2024; : 101646.

- 531 27 Keeble M, Burgoine T, White M, Summerbell C, Cummins S, Adams J. Planning and  
532 Public Health professionals' experiences of using the planning system to regulate hot  
533 food takeaway outlets in England: A qualitative study. *Health Place* 2021; **67**: 102305.
- 534 28 O'Malley CL, Lake AA, Townshend TG, Moore HJ. Exploring the fast food and  
535 planning appeals system in England and Wales: decisions made by the Planning  
536 Inspectorate (PINS). *Perspect Public Health* 2021; **141**: 269–78.
- 537 29 Garde A. Law, Healthy Diets and Obesity Prevention. 2015.
- 538 30 Metcalf CJE, Edmunds WJ, Lessler J. Six challenges in modelling for public health  
539 policy. *Epidemics* 2015; **10**: 93–6.
- 540 31 Cobiac L, Law C, Scarborough P. PRIMETIME: an epidemiological model for  
541 informing diet and obesity policy. *medRxiv* 2024.
- 542 32 Liu B, Mytton O, Rahilly J, *et al.* Development of an approach to forecast future  
543 takeaway outlet growth around schools and population exposure in England. 2024.
- 544 33 Burgoine T, Forouhi NG, Griffin SJ, Wareham NJ, Monsivais P. Associations between  
545 exposure to takeaway food outlets, takeaway food consumption, and body weight in  
546 Cambridgeshire, UK: Population based, cross sectional study. *BMJ (Online)* 2014;  
547 **348**: 1–10.
- 548 34 Burgoine T, Monsivais P, Sharp SJ, Forouhi NG, Wareham NJ. Independent and  
549 combined associations between fast-food outlet exposure and genetic risk for obesity:  
550 a population-based, cross-sectional study in the UK. *BMC Med* 2021; **19**: 1–9.
- 551 35 Briggs ADM, Scarborough P, Wolstenholme J. Estimating comparable English  
552 healthcare costs for multiple diseases and unrelated future costs for use in health and  
553 public health economic modelling. 2018. DOI:10.1371/journal.pone.0197257.
- 554 36 NICE. Guide to the Methods of Technology Appraisal. London: National Institute for  
555 Health andnCare Excellence. 2013.

- 556 37 Adams J, Goffe L, Brown T, *et al.* Frequency and socio-demographic correlates of  
557 eating meals out and take-away meals at home: Cross-sectional analysis of the UK  
558 national diet and nutrition survey, waves 1-4 (2008-12). *International Journal of*  
559 *Behavioral Nutrition and Physical Activity* 2015; **12**: 1–9.
- 560 38 Lawes C, Vander Hoorn S, Law M, Elliott P. Comparative Quantification of Health  
561 Risks: Global and Regional Burden of Disease Attributable to Selected Major Risk  
562 Factors. 2004.
- 563 39 Eliassen AH, Colditz GA, Rosner B, Willett WC, Hankinson SE. Adult Weight  
564 Change and Risk of Postmenopausal Breast Cancer. *JAMA* 2006; **296**: 193.
- 565 40 Stedman M, Lunt M, Davies M, *et al.* Cost of hospital treatment of type 1 diabetes  
566 (T1DM) and type 2 diabetes (T2DM) compared to the non-diabetes population: a  
567 detailed economic evaluation. *BMJ Open* 2020; **10**: e033231.
- 568 41 Meijer P, Numans H, Lakerveld J. Associations between the neighbourhood food  
569 environment and cardiovascular disease: a systematic review. *Eur J Prev Cardiol*  
570 2023; **30**: 1840–50.
- 571 42 Pati S, Irfan W, Jameel A, Ahmed S, Shahid RK. Obesity and Cancer: A Current  
572 Overview of Epidemiology, Pathogenesis, Outcomes, and Management. *Cancers*  
573 *(Basel)* 2023; **15**: 1–21.
- 574 43 Peters U, Dixon AE, Forno E. Obesity and asthma. *Journal of Allergy and Clinical*  
575 *Immunology* 2018; **141**: 1169–79.
- 576 44 Su CA, Kusin DJ, Li SQ, Ahn UM, Ahn NU. The Association between Body Mass  
577 Index and the Prevalence, Severity, and Frequency of Low Back Pain. *Spine (Phila Pa*  
578 *1976)* 2018; **43**: 848–52.
- 579 45 House of Commons library. Obesity statistics. 2023.
- 580 46 Samper-Ternent R, Al Snih S. Obesity in older adults: Epidemiology and implications  
581 for disability and disease. *Rev Clin Gerontol* 2012; **22**: 10–34.

- 582 47 Masters R, Anwar E, Collins B, Cookson R, Capewell S. Return on investment of  
583 public health interventions: A systematic review. *J Epidemiol Community Health*  
584 (1978). 2017; **71**: 827–34.
- 585 48 Jiang L, Tian W, Wang Y, *et al.* Body mass index and susceptibility to knee  
586 osteoarthritis: A systematic review and meta-analysis. *Joint Bone Spine* 2012; **79**: 291–  
587 7.
- 588 49 Berrington de Gonzalez A, Hartge P, Cerhan JR, *et al.* Body-mass index and mortality  
589 among 1.46 million white adults. *N Engl J Med* 2010; **363**: 2211–9.
- 590 50 Rahilly J, Amies-cull B, Chang M, *et al.* Changes in the number of new takeaway food  
591 outlets associated with adoption of management zones around schools: A natural  
592 experimental evaluation in England. *SSM Popul Health* 2024; : 101646.
- 593 51 Dolton PJ, Tafesse W. Childhood obesity, is fast food exposure a factor? *Econ Hum*  
594 *Biol* 2022; **46**: 101153.
- 595 52 De Wit LM, Van Straten A, Van Herten M, Penninx BW, Cuijpers P. Depression and  
596 body mass index, a u-shaped association. *BMC Public Health* 2009; **9**: 1–6.
- 597 53 Kivimäki M, Luukkonen R, Batty GD, *et al.* Body mass index and risk of dementia:  
598 Analysis of individual-level data from 1.3 million individuals. *Alzheimer's and*  
599 *Dementia* 2018; **14**: 601–9.
- 600 54 Copley VR, Cavill N, Wolstenholme J, Fordham R, Rutter H. Estimating the variation  
601 in need for community-based social care by body mass index in England and  
602 associated cost: Population-based cross-sectional study. *BMC Public Health* 2017; **17**:  
603 1–11.
- 604 55 Keeble M, Adams J, Sacks G, *et al.* Use of online food delivery services to order food  
605 prepared away-from-home and associated sociodemographic characteristics: A cross-  
606 sectional, multi-country analysis. *Int J Environ Res Public Health* 2020; **17**: 1–17.



- 607 56 Kalbus A, Ballatore A, Cornelsen L, Greener R, Cummins S. Associations between  
608 area deprivation and changes in the digital food environment during the COVID-19  
609 pandemic: Longitudinal analysis of three online food delivery platforms. *Health Place*  
610 2023; **80**: 102976.
- 611 57 Keeble M, Adams J, Burgoine T. Changes in Online Food Access during the COVID-  
612 19 Pandemic and Associations with Deprivation: Longitudinal Analysis. *JMIR Public*  
613 *Health Surveill* 2023; **9**. DOI:10.2196/41822.
- 614 58 Keeble M, Adams J, Vanderlee L, Hammond D, Burgoine T. Associations between  
615 online food outlet access and online food delivery service use amongst adults in the  
616 UK: a cross-sectional analysis of linked data. *BMC Public Health* 2021; **21**: 1–12.
- 617 59 Brown H, Xiang H, Albani V, *et al*. No new fast-food outlets allowed! Evaluating the  
618 effect of planning policy on the local food environment in the North East of England.  
619 *Soc Sci Med* 2022; **306**: 115126.
- 620 60 Local Government Association. Money Well Spent, Assessing the Cost Effectiveness  
621 and Return on Investment of Public Health Interventions. 2013.
- 622 61 O'Malley CL, Lake AA, Townshend TG, Moore HJ. Exploring the fast food and  
623 planning appeals system in England and Wales: decisions made by the Planning  
624 Inspectorate (PINS). *Perspect Public Health* 2021; **141**: 269–78.
- 625 62 Adams J, Mytton O, White M, Monsivais P. Why Are Some Population Interventions  
626 for Diet and Obesity More Equitable and Effective Than Others? The Role of  
627 Individual Agency. *PLoS Med* 2016; **13**: 1–7.
- 628

## Main Tables

Table 1: Demographic and urban-rural characteristics of six specified local authorities

| Local Authority       | Rural Urban Classification                | Income Deprivation Quintile <sup>1</sup> | Population density <sup>2</sup> | Gender of adult population aged 25-64 years (N) <sup>3</sup> |         |         | Age group, N (%) |                |
|-----------------------|-------------------------------------------|------------------------------------------|---------------------------------|--------------------------------------------------------------|---------|---------|------------------|----------------|
|                       |                                           |                                          |                                 | Males                                                        | Female  | All     | 25-44 years      | 45-64 years    |
| Wandsworth            | London urban with major conurbation       | 3                                        | 9560                            | 99,161                                                       | 106,709 | 205,870 | 142,344 (69.1)   | 63,526 (30.9)  |
| Manchester            | Urban with major conurbation (non-London) | 1                                        | 4773                            | 149,682                                                      | 139,056 | 288,738 | 187,934 (65.1)   | 100,804 (34.9) |
| Sheffield             | Urban with minor conurbation              | 2                                        | 1513                            | 145,487                                                      | 145,249 | 290,736 | 157,524 (54.2)   | 133,212 (45.8) |
| Blackburn with Darwen | Urban with city and town                  | 1                                        | 1129                            | 38,110                                                       | 37,792  | 75,902  | 38,110 (50.2)    | 37,792 (49.8)  |
| North Somerset        | Urban with significant rural              | 3                                        | 580                             | 133,990                                                      | 140,745 | 274,735 | 117,521 (42.8)   | 157,214 (57.2) |
| Fenland               | Largely or mainly rural                   | 2                                        | 188                             | 25,282                                                       | 25,583  | 50,865  | 23,405 (46.0)    | 27,460 (54.0)  |

<sup>1</sup> Income Deprivation quintile is for the whole population. Most deprived quintile = 1

(see: <https://www.ons.gov.uk/peoplepopulationandcommunity/personalandhouseholdfinances/incomeandwealth/datasets/mappingincomedeprivationatalocalauthoritylevel>)

<sup>2</sup> Population/square km (in relation to the whole population) <https://www.ons.gov.uk/datasets/TS006/editions/2021/versions/4?f=get-data>

<sup>3</sup> Numbers are based on PRIMEtime data in 2015

Table 2: Estimated difference<sup>1</sup> in mean number of takeaways an adult is exposed to in 2040<sup>2</sup> due to the intervention<sup>3</sup> compared to business-as-usual.

| Local authority       | Baseline exposure in 2018 <sup>4</sup> | Mean difference in outlet exposure per person compared to business-as-usual scenario |
|-----------------------|----------------------------------------|--------------------------------------------------------------------------------------|
| Wandsworth            | 73.5                                   | -12.6(-9.51, -15.6)                                                                  |
| Manchester            | 91.4                                   | -28.4(-25.8, -31.0)                                                                  |
| Sheffield             | 74.9                                   | -21.4(-17.3, -25.5)                                                                  |
| Blackburn with Darwen | 66.6                                   | -15.7(-9.43, -22.0)                                                                  |
| North Somerset        | 18.6                                   | -4.09(-3.50, -4.69)                                                                  |
| Fenland               | 17.7                                   | -3.20(-1.98, -4.43)                                                                  |

<sup>1</sup>Upper and Lower confidence intervals are indicated in brackets.

<sup>2</sup>Trajectories of takeaway growth were assumed to increase until 2031 and then stabilise between 2031-2040

<sup>3</sup>The intervention was based on a realistic scenario where new takeaway growth reduces by 50% each year following the intervention.

<sup>4</sup> Estimated Outlet exposure (from home, work and commuting) in 2018

Table 3: Change in mean BMI in the adult population (2018 to 2040)<sup>1</sup> in six specified local authorities, following implementation of takeaway management zones<sup>2</sup> in 2018.

| Local authority       | Baseline Obesity level (%) <sup>3</sup> | Estimated change in BMI (kg/m <sup>2</sup> ) |
|-----------------------|-----------------------------------------|----------------------------------------------|
| Wandsworth            | 14.4                                    | -0.30 (-0.23, -0.38)                         |
| Manchester            | 25.4                                    | -0.68 (-0.62, -0.75)                         |
| Sheffield             | 25.3                                    | -0.52(-0.42, -0.61)                          |
| Blackburn with Darwen | 23.0                                    | -0.38(-0.23, -0.53)                          |
| North Somerset        | 23.0                                    | -0.10(-0.08, -0.11)                          |
| Fenland               | 40.1                                    | -0.08(-0.05, -0.11)                          |

<sup>1</sup> Trajectories of BMI were assumed to change until 2031 and then stabilise between 2031-2040

<sup>2</sup> The intervention was based on a realistic scenario where new takeaway growth reduces by 50% each year following the intervention.

<sup>3</sup> Percentage of adults aged 18 + who are living with obesity

Table 4: Impact of the intervention on quality adjusted life years (QALYs), healthcare cost savings and obesity prevalence in the adult population (2018 to 2040) in six specified local authorities.

|                       | Total QALYs gained <sup>1</sup> |                   |                                     | Healthcare cost saving <sup>1,2</sup> (£ in millions) |                   |                                    | Percentage point reduction in obesity prevalence |                   |
|-----------------------|---------------------------------|-------------------|-------------------------------------|-------------------------------------------------------|-------------------|------------------------------------|--------------------------------------------------|-------------------|
|                       | Males                           | Females           | QALYs gained/<br>100,000 population | Males                                                 | Females           | Savings per<br>100, 000 population | Males                                            | Females           |
| Mandsworth            | 282 (204, 367)                  | 231 (169, 300)    | 249.19                              | 1.81(1.26, 2.47)                                      | 2.36 (1.61, 3.35) | 2.02 (1.39, 2.83)                  | -1.5 (-1.9, -1.1)                                | -1.5 (-1.9, -1.2) |
| Manchester            | 425 (317, 546)                  | 270 (202, 343)    | 240.70                              | 2.62 (1.88, 3.53)                                     | 2.82 (1.99, 3.92) | 1.88 (1.34, 2.58)                  | -2.3 (-2.9, -1.7)                                | -1.9 (-2.4, -1.4) |
| Sheffield             | 344 (257, 437)                  | 252(189, 321)     | 205.00                              | 2.22(1.61, 2.97)                                      | 2.73(1.93,3.75)   | 1.70 (1.22, 2.31)                  | -2.2 (-2.8, -1.6)                                | -1.9 (-2.4, -1.4) |
| Blackburn with Darwen | 101 (76, 128)                   | 75 (56, 95)       | 231.88                              | 0.64 (0.45, 0.86)                                     | 0.80 (0.56, 1.12) | 1.90 (1.33, 2.61)                  | -1.9 (-2.4, -1.5)                                | -1.8 (-2.2, -1.3) |
| North Somerset        | 284 (213, 363)                  | 248 (185, 315)    | 193.64                              | 1.93 (1.39, 2.59)                                     | 2.59 (1.82, 3.59) | 1.65 (1.17, 2.25)                  | -1.6 (-2.0, -1.2)                                | -1.7 (-2.0, -1.2) |
| Wenland               | 61.2 (45.7, 78.4)               | 51.5 (38.6, 65.5) | 221.57                              | 0.40 (0.29, 0.54)                                     | 0.50 (0.35, 0.69) | 1.77 ( 1.26, 2.42)                 | -1.9 (-2.4, -1.4)                                | -1.7 (-2.1, -1.3) |

<sup>1</sup> Based on the following conditions: type II diabetes, ischemic heart disease, hypertensive heart disease, stroke, atrial fibrillation and flutter, colon and rectal cancer, esophageal cancer, breast cancer (females only), asthma, low back pain, hip and knee arthritis.

<sup>2</sup> Healthcare costs and population health are discounted as per NICE recommendations for public health interventions.

Table 5: Change in incident cases of disease /100,000 adult population (2018 to 2040), in six specified local authorities.

|                               | Blackburn with Darwen | Fenland              | Manchester           | Sheffield            | North Somerset       | Wandsworth            |
|-------------------------------|-----------------------|----------------------|----------------------|----------------------|----------------------|-----------------------|
| <b>Males</b>                  |                       |                      |                      |                      |                      |                       |
| <b>Metabolic</b>              |                       |                      |                      |                      |                      |                       |
| Type II diabetes              | -1013 (-1285, -753)   | -995 (-1262, -740)   | -964 (-1565, -870)   | -803(-1023, -594)    | -804 (-1018, -600)   | -1206 (-1565, -870)   |
| <b>Cardiovascular disease</b> |                       |                      |                      |                      |                      |                       |
| Ischaemic heart disease       | -153 (-192, -117)     | -105(-131, -80.6)    | -124 (-157, -94.1)   | -118 (-149, -90.0)   | -91.1 (-114, -70.3)  | -99.2 (-125, -75.3)   |
| Hypertensive heart disease    | -8.16 (-13.5, -3.22)  | -8.32 (-13.6, -3.45) | -6.89 (-11.9, -2.13) | -7.91 (-13.1, -3.09) | -8.42 (-13.7, -3.59) | -6.73 (-11.9, -2.03)  |
| Stroke                        | -9.32 (-12.5, -6.41)  | -15.9 (-21.1, -11.0) | -21.1 (-28.3, -14.5) | -17.3 (-23.3, -11.9) | -15.2 (-20.1, -10.5) | -18.9 (-25.3, -12.9)  |
| Atrial fibrillation & flutter | -72.5 (-102, -47.8)   | -61.7 (-86.6, -40.7) | -60.6 (-85.5, -39.8) | -59.7 (-83.8, -39.4) | -57.3 (-80.3, -4.17) | 62.0 (-87.7 -40.6)    |
| <b>Cancer</b>                 |                       |                      |                      |                      |                      |                       |
| Colon & rectum Cancer         | -1.05 (-1.57, -0.52)  | -1.58 (-2.77, -0.79) | -1.59 (-2.41, -0.83) | -1.76 (-2.64, -0.93) | -1.22 (-1.79, -0.69) | -0.91. (-1.31, -0.51) |
| Oesophageal                   | -0.03 (-0.05, -0.03)  | -3.16 (-4.35, -1.98) | -3.28 (-4.54, -2.24) | -2.94 (-4.04, -2.02) | -3.58 (-5.00, -2.44) | < 0.01 (0.01, 0.01)   |
| <b>Respiratory</b>            |                       |                      |                      |                      |                      |                       |
| Asthma                        | -196 (-293, -107)     | -187 (-283, -101)    | -192 (-288, -105)    | -169 (-252, -93.4)   | -182 (-278, -97.2)   | -238 (-366, -125)     |
| <b>Musculo-skeletal</b>       |                       |                      |                      |                      |                      |                       |
| Low back pain                 | -272 (-532, -21.0)    | -278 (-556, -5.03)   | -332 (-650, -29.0)   | -277 (-534, -31.6)   | -332 (-676, 1.58)    | -249 (-534, 22.2)     |
| Hip osteoarthritis            | 0.52 (0.52, 0.79)     | 0.40 (0.40, -0.40)   | 0.6 (0.47, 0.73)     | 0.55 (0.41, 0.62)    | 0.15 (0.15, 0.22)    | 0.30 (0.20, -0.81)    |
| Knee osteoarthritis           | 2.62 (2.10, 2.62)     | 1.98 (1.58, 2.37)    | 2.74 (2.20, 3.34)    | 2.41 (1.92, 2.96)    | 0.97 (0.75, 1.19)    | 1.21 (0.91, 1.51)     |
| <b>Females</b>                |                       |                      |                      |                      |                      |                       |
| <b>Metabolic</b>              |                       |                      |                      |                      |                      |                       |
| Type II diabetes              | -837 (-1048, -634)    | -987 (-1228, -754)   | -725(-911, -546)     | -677(-847, -513)     | -801 (-997, -612)    | -879(-1116, -648)     |
| <b>Cardiovascular disease</b> |                       |                      |                      |                      |                      |                       |
| Ischaemic heart disease       | -49.8 (-62.3, -38.3)  | -39.2 (-48.9, -30.2) | -41.8 (-52.7, -31.8) | -41.1 (-51.7, -31.4) | -34.4 (-42.8, -26.6) | -31.4 (-39.7, -23.9)  |
| Hypertensive heart disease    | -5.47 (-8.72, -2.38)  | -5.92 (-9.18, -2.77) | -4.68 (-7.52, -1.86) | -5.37 (-8.40, -2.34) | -6.18 (-9.73, -2.91) | -4.40 (-7.40, -1.59)  |
| Stroke                        | -19.0 (-25.6, -13.5)  | -15.2 (-20.4, -10.8) | -20.1 (-27.2, -13.9) | -16.7 (-22.5, -11.6) | -15.3 (-20.4, -10.9) | -15.2 (-20.7, -10.5)  |
| Atrial fibrillation & flutter | -32.7 (-45.9, -21.6)  | -30.9 (-43.3, -20.5) | -30.9 (-43.3, -20.5) | -27.2 (-38.1, -18.0) | -31.8 (-44.6, -21.1) | -24.1 (-34.1, -15.8)  |
| <b>Cancer</b>                 |                       |                      |                      |                      |                      |                       |
| Colon & rectum Cancer         | -1.02(-1.50, -0.57)   | -0.78 (-1.56, -0.39) | -0.95 (-1.40, -0.53) | -0.96 (-1.45, -0.55) | -1.14(-1.71, -0.64)  | -0.67(-1.03, -0.37)   |
| Oesophageal                   | <0.01 (0.01, 0.01)    | -0.78 (-0.78, -0.39) | <0.01 (0.01, 0.01)   | -0.48 (-0.69, -0.34) | <0.01 (0.01, 0.01)   | <0.01 (0.01, 0.01)    |
| Breast Cancer                 | -6.43 (-8.63, -4.49)  | -6.65 (-8.99, -4.69) | -6.56 (-8.82, -4.58) | -6.61 (-8.88, -4.61) | -6.68 (-8.95, -4.69) | -6.28 (-8.43, -4.40)  |
| <b>Respiratory</b>            |                       |                      |                      |                      |                      |                       |
| Asthma                        | -402 (-603, -220)     | -327 (-490, -179)    | -361 (-542, -199)    | -325 (-485, -180)    | -318 (-483, -171)    | -444 (-681, -235)     |
| <b>Musculo-skeletal</b>       |                       |                      |                      |                      |                      |                       |
| Low back pain                 | -326 (-644, 16.5)     | -312 (-613, 16.7)    | -325 (-638, -23.8)   | -319 (-618, 31.2)    | -316 (-613, 1.51)    | -318 (-666, 11.3)     |
| Hip osteoarthritis            | 0.26 (0.26, 0.26)     | 0.04 (0.03, 0.05)    | 0.22 (0.14, 0.22)    | 0.14 (0.14, 0.21)    | 0.14 (0.14, 0.21)    | 0.09 (0.09, 0.09)     |
| Knee osteoarthritis           | 1.06 (0.79, 1.32)     | 0.78 (0.78, 1.17)    | 1.08 (0.86, 1.37)    | 0.96 (0.76, 1.17)    | 0.78 (0.78, 1.17)    | 0.47 (0.37, 0.66)     |



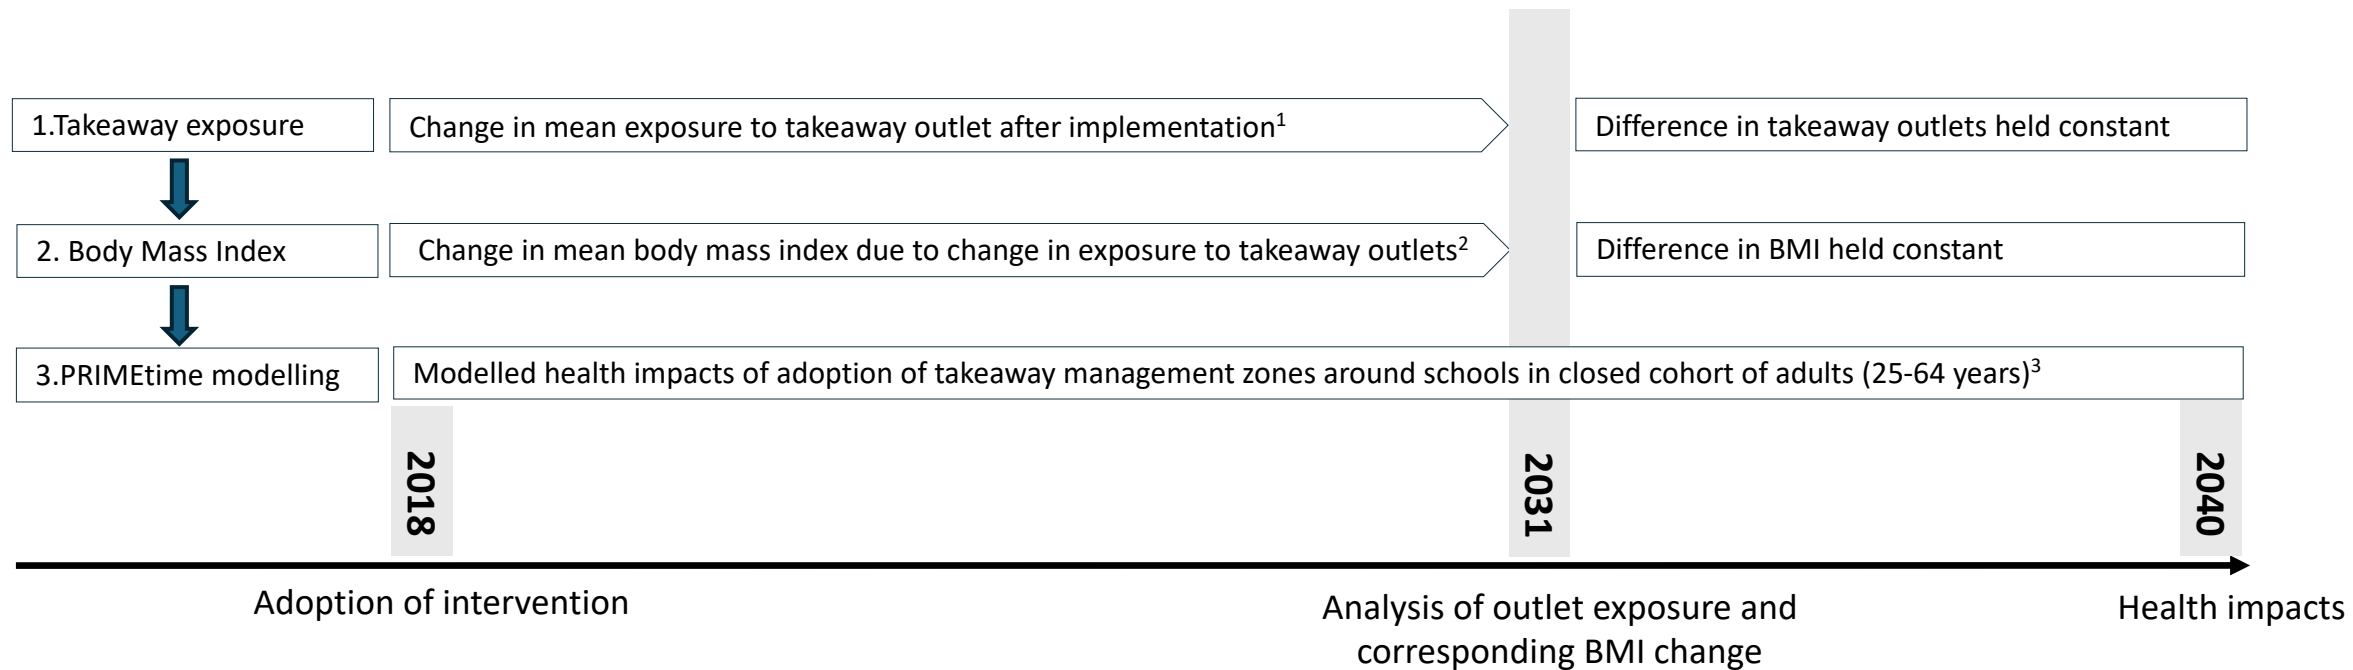

Figure 1: Schematic diagram of analysis strategy.

<sup>1</sup>Change in mean exposure to takeaways (by 2031) is calculated by comparing the difference in outlet exposure from a business-as-usual model (see Liu et al, 2024) to an intervention that reduces outlet growth between by 50%.

<sup>2</sup> For each additional takeaway an individual is exposed to, mean BMI increases by 0.0241 kg/m<sup>2</sup>. See Burgoine et al, 2014

<sup>3</sup> For PRIMETIME modelling, the oldest age of a cohort member would be aged 64 years old at baseline (2018) and who would be 86 years old by 2040. Some adults will be lost to follow-up, for example due to premature mortality.
